# Supplementary material
Source: Springer Nature journal article supplement (https://www.springermedizin.de/resource/supplementary/12916_2011_395_MOESM2_ESM.pdf/9599852)
Supplement: MOESM2 [file 9599852]

Identification of cell lines as positive controls

*In house or publicly available expression array datasets*

Validation of positive controls (qRT-PCR and WB)

Positive control

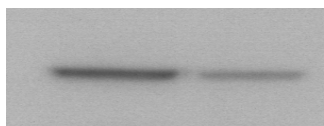

siRNA knock-down of gene of interest

*Validation*

Negative control

Generation of FFPE cell pellets

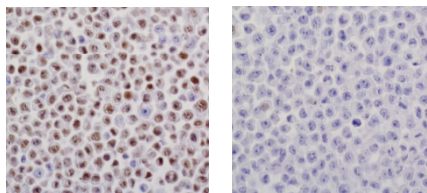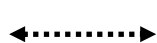

Antibody testing

(Various antigen retrieval methods and antibody dilutions tested)

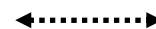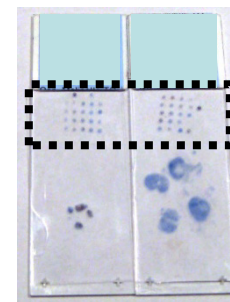

CTRL TMA

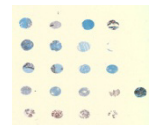

Optimisation of IHC on FFPE tissues
